1 **Dissociable oscillatory networks support gain and loss**  
2 **processing in human orbitofrontal cortex**

3

4 **Authors: Ignacio Saez<sup>1</sup>, Jack Lin<sup>2</sup>, Edward Chang<sup>3</sup>, Josef Parvizi<sup>4</sup>, Robert T. Knight<sup>5</sup>, and**  
5 **Ming Hsu<sup>5</sup>**

6

7 **Affiliations:**

8 <sup>1</sup> University of California, Davis, Davis, CA 95618, USA

9 <sup>2</sup> University of California, Irvine, Irvine, CA 92697, USA

10 <sup>3</sup> University of California, San Francisco, San Francisco, CA 94143, USA

11 <sup>4</sup> Stanford University, Stanford, CA 94305, USA

12 <sup>5</sup> University of California, Berkeley, Berkeley, CA 94720, USA

13

14 **Contact information:**

15 \*Correspondence to: [isaez@ucdavis.edu](mailto:isaez@ucdavis.edu) or [mhsu@haas.berkeley.edu](mailto:mhsu@haas.berkeley.edu).

## 16 **Abstract**

17 Human neuroimaging and animal studies have linked neural activity in orbitofrontal cortex  
18 (OFC) to valuation of positive and negative outcomes. Additional evidence shows that neural  
19 oscillations, representing the coordinated activity of neuronal ensembles, support information  
20 processing in both animal and human prefrontal regions. However, the role of OFC neural  
21 oscillations in reward-processing in humans remains unknown, partly due to the difficulty of  
22 recording oscillatory neural activity from deep brain regions. Here, we examined the role of OFC  
23 neural oscillations (<30Hz) in reward processing by combining intracranial OFC recordings with  
24 a gambling task in which patients made economic decisions under uncertainty. Our results show  
25 that power in different oscillatory bands are associated with distinct components of reward  
26 evaluation. Specifically, we observed a double dissociation, with a selective theta band  
27 oscillation increase in response to monetary gains and a beta band increase in response to losses.  
28 These effects were interleaved across OFC in overlapping networks and were accompanied by  
29 increases in oscillatory coherence between OFC electrode sites in theta and beta band during  
30 gain and loss processing, respectively. These results provide evidence that gain and loss  
31 processing in human OFC are supported by distinct low-frequency oscillations in networks, and  
32 provide evidence that participating neuronal ensembles are organized functionally through  
33 oscillatory coherence, rather than local anatomical segregation.

34

## 35 **Introduction**

36 The human orbitofrontal cortex (OFC) is a critical node in reward-based decision-making:  
37 activity in OFC reflects value computations [1,2] and damage to OFC results in abnormal choice  
38 behavior [3,4]. Among the proposed functions of OFC, valuation and outcome processing are  
39 central. Valuation of positive and negative outcomes, which are necessary to learn about states  
40 of the world to inform future approach and avoidance behavior, have been associated with neural  
41 activity in OFC in both fMRI and animal studies [5–8].

42  
43 Despite considerable progress, important questions remain regarding the organization of  
44 neuronal ensembles in valuation processes in OFC. In particular, while there is an increasing  
45 appreciation of the importance of neural oscillations in cognitive processing, whether they play a  
46 role in reward processing in OFC is unclear. Neural oscillations are generated by concurrent  
47 excitability fluctuations in groups of neurons, which generate periodic activity changes organized  
48 in several oscillatory bands (e.g. theta, 4-8 Hz, alpha 8-12 Hz and beta, 12-30Hz). Ongoing  
49 oscillations modulate input selection by favoring information that arrives at particular times in an  
50 oscillatory cycle, and allow the coordination of ensembles of neurons that share relevant  
51 information by establishing transiently synchronized networks [9]. Oscillatory coherence, in  
52 which oscillations across brain regions show a consistent phase relationship, is proposed to  
53 facilitate cross-areal communication by favoring phase-dependent activation of neurons [10].  
54 Neural oscillations have been implicated in a variety of cognitive processes. In human studies,  
55 they have been extensively examined in non-invasive EEG and MEG studies and more recently  
56 in intracranial research (electrocorticography; ECoG). These studies have associated low-  
57 frequency neuronal oscillations with a variety of cognitive processes, including working memory

58 [11,12], attention [13,14], sensory processing [15,16], motor control [17,18] and goal direction  
59 [19,20]. Prefrontal low-frequency oscillations have been specifically implicated in working  
60 memory, attention and spatial navigation [11,13,21,22]. Regarding reward processing, distinct  
61 scalp EEG frequency bands in prefrontal cortex have been shown to be differentially sensitive to  
62 gain and loss outcomes in the beta and theta bands, respectively [23,24].

63

64 Despite the proposed important of oscillatory processes in prefrontal function and the central role  
65 of OFC in reward-related processes, the nature of the involvement of oscillatory neural  
66 processing and coherence processes in reward processing in the human OFC remains poorly  
67 understood. This is in part due to due to the difficulty of measuring oscillatory activity in deep  
68 brain regions such as OFC using non-invasive approaches. Here, we leverage a unique patient  
69 population, human epilepsy patients undergoing intracranial monitoring, to directly examine the  
70 role of oscillatory neural activity in the human OFC during reward processing. Here we focus on  
71 low frequency (<30Hz) activity in a previous gambling task [25] to assess the association  
72 between oscillatory activity in OFC and reward processing.

73

74 Our results show that functionally distinct networks respond to gain and loss processing within  
75 OFC. Specifically, we observed a clear functional dissociation between sites in OFC associated  
76 with processing gain- and loss information, consistent with past EEG findings of frontal  
77 engagement in reward processing. However, unlike previous EEG findings, we found that  
78 monetary gains were associated with an increase in theta power (4-8Hz) whereas losses were  
79 associated with an increase in beta power (12-30 Hz) power. In addition, these frequency-  
80 specific power modulations were accompanied by selective increases in coherence, supporting

81 the notion that reward-relevant information is organized in parallel neural ensembles oscillating  
82 in different frequencies. Anatomically, coherent theta/beta oscillations after gains/losses were not  
83 restricted to sites encoding gains/losses, indicating that coherence is an OFC-wide phenomenon.  
84 Finally, gain and loss networks were interspersed throughout the orbital surface, and did not  
85 follow any simple anatomical distribution (e.g., clusters or gradients). These results demonstrate  
86 that anatomically distributed low frequency oscillations differentially encode reward-related  
87 information in the human OFC, with power modulation in the theta and beta bands encoding  
88 gains and losses. In addition, gain and loss processing networks are not clustered anatomically.  
89 Instead, selective increases in OFC-wide oscillatory coherence suggest that these separate  
90 ensembles may be organized functionally through coherence. The combination of analysis of  
91 neural oscillations with decision-making models provides a novel approach to understand the  
92 neural basis of decision-making within and across brain areas.

93

## 94 **Results**

95 We recorded LFP activity from 210 electrodes (192 after quality control; see Methods) in 10  
96 patients while they played a gambling task (see Fig. 1A and Fig. S1 for electrode locations).  
97 Briefly, participants played 200 trials in which they choose between a sure prize and a risky  
98 gamble (Fig. 1B). Patient choices were dependent on gamble win probability, expected utility  
99 and risk (all  $p < 10^{-15}$ , random effects logit analysis) and was similar to that of healthy subjects  
100 (Fig. 1C, grey line; all comparisons  $p > 0.2$ ). Local field potentials (LFP) were recorded from all  
101 ECoG electrodes and frequency-band decomposed using a wavelet approach. We focus here on  
102 activity in low frequency bands ( $< 30$ Hz); results from high-frequency analyses (70-200 Hz) were  
103 reported previously [26].

104

105 **Dissociation modulation of OFC low-frequency activity by outcome valence**

106 To characterize whether power modulation in low frequency bands (theta, 4-8Hz; alpha, 8-12Hz;  
107 beta, 12-30Hz) carried relevant reward-related information during outcome evaluation, we  
108 generated a time-frequency representation (TFR) of neural activity using a wavelet approach.  
109 We observed power modulation across the theta and beta frequency bands, time locked to the  
110 reveal epoch (0-1.5 post-outcome reveal; Fig. 1D and S2). We then carried out linear regressions  
111 to identify gain/loss power modulation in each time-frequency tile. Specifically, we examined  
112 how much variance in neural power (percentage of explained variance, %EV) could be explained  
113 by gain/loss regressors across time and frequency bands (see Methods).

114

115 This generated Event-Related Computational Profiles (ERCs) containing time x frequency  
116 depictions of the level of association between power and regressors of interest, which reveal the  
117 frequency specificity and timing of information encoding. We first examined the association  
118 between power encoding and gain events (i.e. trials in which the subject opted to gamble and  
119 won; Fig. 2) by averaging ERCs across all patients and electrodes in our sample (n=192). We  
120 observed a significant association between gains and power in the delta-theta frequency bands  
121 (1-8Hz; Fig. 2A and C). Because slow oscillations in the delta band are difficult to estimate  
122 adequately given the duration of our analysis windows (~0.5-1s), we centered on analyzing the  
123 theta-band (4-8Hz). Fig. 2C shows an example electrode in which gain trials were associated  
124 with an increase in power compared to all other trials. Next, we performed a similar analysis for  
125 loss trials (Fig. 2B and D), which revealed a different activity pattern, with losses associated with  
126 modulation in the beta (12-30Hz) frequency band (Fig. 2B; individual electrode example in Fig.

127 2D). The average variance in the neural signal explained by gain outcomes was higher for the  
128 theta than for the beta frequency band, whereas the opposite was true for loss outcomes (Fig.  
129 2E), indicating a double dissociation between beta-theta frequencies and outcome encoding. The  
130 direction of modulation was consistent across electrodes, with a majority showing increased  
131 theta power in gain trials (Fig. S4).

132  
133 To verify that these results were not driven by inter-subject or inter-electrode variation in neural  
134 activity, we used a nested mixed-effects model that included patient and electrode identity as  
135 random effects (see Methods). We found that regressions for both gains and losses were  
136 significantly active ( $p < 10^{-5}$ , corrected for multiple comparisons across frequency bands),  
137 indicating that gain/loss computations were robust across electrodes and patients. These results  
138 are consistent with a dissociable association between reward encoding in low frequency bands,  
139 with theta and beta band activity associated with gain and loss events, respectively.

140

#### 141 **Overlapping anatomical distribution of gain and loss responses**

142 Previous fMRI results have suggested an anatomical gradient of win/loss encoding, with loss  
143 responsivity higher in medial aspects of the OFC, and win processing located more laterally  
144 [7,27]. To examine whether there was anatomical segregation of gain- and loss-encoding in our  
145 ECoG dataset, we investigated the anatomical location of the encoding electrodes in our  
146 population.

147

148 We defined encoding electrodes as those showing a significant relationship between power  
149 modulation in beta (for losses) and theta (for gains) using a clustering approach followed by a

150 permutation test (see Methods). Overall, we found that a similar proportion of electrodes  
151 encoded wins (30/192; 15.6%) and losses (29/192; 15.1%). A few electrodes encoded both losses  
152 and wins (6/192, 3.1%), but this proportion is not significantly overrepresented compared to a  
153 random overlap of both networks ( $p=0.58$ , chi-square test). Next, we examined the anatomical  
154 localization of these electrodes. To enable comparison across patients, patient scans and their  
155 corresponding electrode locations were normalized to template space (see Methods). We found  
156 that gain- and loss-encoding sets of electrodes were not segregated in distinct Brodmann areas,  
157 but instead were intermixed across the entire OFC surface (Fig. 3 and Fig. S4) suggesting  
158 anatomically distributed OFC encoding of gain and loss information.

159

#### 160 **Neural activity in OFC shows outcome and frequency-specific coherence**

161 Since cortical sites engaged in gain and loss processing are not anatomically clustered, another  
162 possibility is that they are instead organized as a functional ensemble through coordinated  
163 changes in inter-electrode coherence. Coherent neural oscillations have been proposed as a  
164 potential mechanism to achieve functional communication across cortical sites, which could play  
165 a role in sharing outcome-specific information across OFC sites. To assess whether neural  
166 oscillations were engaged during outcome processing, we examined low frequency coherence  
167 after outcome reveal. To assess this possibility, we calculated coherence at the time of the  
168 outcome reveal event across all low-frequency bands (1-30Hz) for all pairs of OFC electrodes for  
169 each patient in our dataset. To compensate for potential differences in baseline coherence across  
170 patients and electrodes, we used a within-electrode analytical strategy, calculating coherence  
171 separately for different trial types (loss, win and safe bet) after the gamble outcome reveal. The  
172 resulting coherence estimates were then compared using a mixed-model approach (see Methods)



173 that include electrode and patient identity as random effects terms.

174

175 The results showed that win and loss events were accompanied by significant increases in  
176 coherence, in a frequency-specific manner consistent with the power encoding results.  
177 Specifically, gain events were accompanied by an increase in theta-band coherence (Fig. 4C),  
178 whereas loss events were associated with an increase in beta coherence (Fig. 4D). To verify that  
179 these coherence increases were not solely driven by an increase in power modulation, we  
180 conducted a linear regression analysis in which we examined the association between the  
181 average power across electrodes in each pair and their coherence, separately for each frequency  
182 band (theta/beta). We found no evidence that higher coherence was associated with higher power  
183 values across electrode pairs (both  $p > 0.3$ ), revealing that the coherence effects were separable  
184 from the power modulation effects. As was the case with the power results, there was a double  
185 dissociation between gain/loss outcome encoding and frequency-specific coherence increases  
186 (Fig. 4E). Finally, direct comparison of the time-courses of gain-theta and loss-beta power and  
187 coherence modulation showed comparable time profiles and onsets (Fig. S5).

188

### 189 **Comparison to HFA results**

190 In a previous study, we described encoding of reward-related information in high-frequency  
191 activity (HFA) in human OFC [26]. Because gain and loss information was also reflected in  
192 HFA, we examined the relationship between HFA and low-frequency encoding in human OFC  
193 by directly comparing both sets of results. First, we compared the proportion of cortical sites  
194 encoding gains and losses in low and high- frequencies. We found that a comparable number of  
195 cortical sites encoded theta-gain ( $n=29/192$  electrodes) and beta-loss ( $n=30/192$  electrodes), and

196 comparable to the proportion of HFA-gain (n=45/192) and HFA-loss (n=33/192) encoding sites  
197 we reported earlier. Thus, outcome encoding in beta/theta and HFA recruited activation in a  
198 comparable number of cortical sites.

199  
200 One possibility is that low and HFA encoding reflect activation of the same network of cortical  
201 sites. To examine whether that was the case, we next examined the proportion of cortical sites  
202 encoding outcomes in both HFA and low frequencies. We found that electrodes encoding gains  
203 in both HFA and theta band activity were not overrepresented (n=9/192 vs 8.15/192 expected  
204 from random mixing, p=0.13,  $\chi^2$  test). However, electrodes encoding in both HFA and beta were  
205 slightly overrepresented (n=9/192 observed vs 4.53/192 expected from random mixing, p<0.05,  
206  $\chi^2$  test). Overall, these results do not provide strong support for the notion that modulation in  
207 both low frequencies and HFA occurs in the same cortical sites.

208

## 209 **Discussion**

210 We assessed whether neuronal oscillations, implicated in a variety of cognitive processes in  
211 human prefrontal cortex, play a role in processing reward outcomes in the OFC. To test this  
212 notion, we carried out multi-electrode ECoG recordings directly from the OFC of human  
213 neurosurgical patients while they made a series of decisions under uncertainty in gambling game.  
214 Our results show that low-frequency neural activity in human OFC encodes information about  
215 reward outcomes, with losses and gains having separable physiological and anatomical  
216 substrates. Specifically, we found that gains were associated with power increases in theta-band  
217 (4-8Hz), whereas losses were associated with power increase in the beta band (12-30Hz).  
218 Cortical sites showing significant theta/beta power modulation were not anatomically segregated,

219 but rather interspersed across the orbitofrontal surface. Finally, we observed a concomitant  
220 increase in OFC-wide coherence in theta (for gains) and beta (for losses) that was not driven by  
221 power increases.

222

### 223 **Oscillations encode reward-related information**

224 Prefrontal low-frequency oscillations have been implicated in a variety of cognitive processes,  
225 including working memory, attention, language and spatial navigation [11,13,21,22,28]. Here,  
226 we add to the growing body of work implicating neural oscillations in reward outcome  
227 processing in decision-making [23,24]. EEG studies also suggest a differential role for low-  
228 frequency bands in reward processing, with theta and beta-band activity as the main oscillatory  
229 substrates for gain and loss processing, but the nature of their association varies across studies.  
230 For instance, increases in beta power were associated with gain processing [23,29,30], and  
231 increases in theta power with losses or negative feedback [23,31]. MEG recordings in humans  
232 have also proposed an increase in theta OFC is associated with win outcomes [32]. However,  
233 other EEG studies shows a reverse pattern more consistent with the one we report here, with beta  
234 activation in response to no reward or error conditions (comparable to our loss trials) and theta in  
235 reward conditions [24,33].

236

237 There are several possible explanations for these discrepancies. One possibility is that they are  
238 due to methodological differences between EEG/MEG/ECOG. However, even within modality,  
239 opposite effects can be found (e.g. EEG [30,33]), which makes this unlikely to be the only source  
240 of discrepancy. Another possibility is that there are differences in the source of oscillatory  
241 activity. EEG sources vary between prefrontal (Fz) and lateral (F6), with common estimated

242 anatomical locations in ACC and LPFC, but they are unlikely to capture activity originating from  
243 the OFC. However, given that these areas are all implicated in reward processing [5,8,34,35] and  
244 the proposed role of oscillations in establishing functional connectivity across brain areas [10], it  
245 is possible that LPFC/ACC and OFC oscillations are functionally related. If that was the case,  
246 discrepancies between OFC and LPFC/ACC oscillations may reflect the different roles (bottom-  
247 up vs top-down) established by both reward-responsive areas, or their relative temporal  
248 organization. For example, reward information may be processed first in OFC and then  
249 communicated to LPFC, and this functional communication may be reflected in oscillatory  
250 activity or in temporal activation patterns.

251  
252 Another possible explanation relates to the different definitions of gains and losses across tasks.  
253 In some EEG studies, losses refer to a negative money gain [23] (but see [24]). In our study, loss  
254 events can also be described as absence of reward, rather than an actual loss (e.g. negative gains),  
255 a design that we adopted because of limitations, including human subjects protections and  
256 working with patients. Thus, encoding of losses may be associated with a different neural  
257 representation altogether. Finally, it is also possible that they reflect different cognitive demands  
258 across tasks. Unlike some of the non-invasive experiments, our gambling task does not require  
259 working memory. Since working memory load is associated with theta band power [36], it is  
260 possible that the different cognitive demands of a working memory-reward task, as compared to  
261 a gambling task with no memory demands, engages another circuitry indexed by different  
262 oscillatory mechanisms. Despite these discrepancies, these different studies consistently show  
263 that neural activity across theta and beta bands is recruited during feedback processing, and that  
264 they represent separate neural processing channels for gains and losses.

265

266 **Functional organization of low frequency responses to gains and losses**

267 Neuroimaging data suggests anatomically-segregated processing for different aspects of reward  
268 in OFC, for options varying in desirability (appetitive/aversive), abstractness (primary rewards  
269 such as food, water vs. secondary rewards such as money), as well as for valuation/choice  
270 processes [7,27,37,38], suggesting the existence of anatomical segregation of reward functions.  
271 Our data, however, does not support anatomical segregation of gain and loss low frequency  
272 encoding across OFC subregions in our task (Fig. S3). Rather, we observed that win and loss  
273 networks were distributed across the orbitofrontal surface (Fig. 4), which is also consistent with a  
274 similar pattern with reward-related HFA encoding [26], suggesting that separation of reward  
275 information is not associated with anatomical segregation.

276

277 Instead, coordination of distinct types of reward across cortical sites may be supported by  
278 functional activity patterns manifesting as oscillatory coherence. In support of this hypothesis,  
279 we observed a generalized increase in low-frequency coherence across OFC electrodes during  
280 reward outcome. Consistent with the power modulation results, this coherence increase was  
281 frequency- and outcome-specific, with separate beta and theta coherence increases following  
282 losses and gains, respectively (Fig. 4).

283

284 There are several potential functional roles for these coherence increases. Low frequency  
285 oscillations in monkey PFC reflect abstract rules relevant to ongoing behavior, with beta and  
286 alpha synchronies organizing neural ensembles representing different rules [20]. A similar  
287 mechanism may be at play here, with theta and beta ensembles carrying complementary but

288 distinct reward information. In addition, coherence has been proposed to support functional  
289 communication across cortical sites [10]. Thus, one possibility is that synchronous oscillations in  
290 OFC facilitate information sharing across cortical sites with distinct encoding properties.  
291 Furthermore, we observed that coherence increases are not driven by power increases. For  
292 example, loss (gain) events, which are associated with an increase in beta (theta) power, may  
293 entrain other OFC sites through oscillatory coherence without directly modulating their  
294 oscillatory power. Coherent oscillations may also provide a mechanism to broadcast reward  
295 relevant information from OFC to other reward-responsive cortical areas (e.g. LPFC), reflecting  
296 cross-areal information processing, an idea that will need to be tested in future experiments.

297

298 Overall, the existence of these separate oscillatory networks, in addition to the diffuse anatomical  
299 organization described above, supports the notion that parallel neural ensembles carry different  
300 but complementary types of reward-related information. Interestingly, the increase in theta  
301 coherence was not limited to the time of outcome reveal, but showed a peak that ramped up  
302 before gamble reveal (Fig. S3). Given that patients choose to gamble more often in trials in  
303 which win probability is higher (Fig. 1C), expectation of reward is correlated with win outcomes  
304 in our dataset. Thus, it is possible that this pre-reveal activation reflects a reward expectation  
305 effect. Consistent with this idea, neurons in the orbitofrontal cortex of rodents have been shown  
306 to phase-lock to theta band oscillations in anticipation of reward [39], and theta-band activity is  
307 also modulated in human frontal cortex [40]. Theta is also related to attentional processes in  
308 other cortical regions, compared to a role of beta in top-down processing [41], so an alternative  
309 explanation would be an increase in attention in trials in which a positive outcome is expected.

310

### 311 **Separate oscillatory mechanisms for gain and loss processing – functional relevance**

312 The existence of separate, but related encoding mechanisms across different frequency bands for  
313 gain and loss processing in the human OFC raises a number of questions on their neurobiological  
314 origin and functional significance. Low frequency LFP activity captures a diverse number of  
315 voltage generators, the most prominent ones being postsynaptic currents, both excitatory and  
316 inhibitory. In contrast, activity in higher frequency bands (60Hz and above, i.e. high frequency  
317 activity; HFA) reflects local cortical activation, including neuronal spiking and dendritic  
318 currents [42,43]. Thus, it is possible that encoding in low frequency and HFA may capture  
319 different activation aspects of the same neuronal ensembles. For example, theta/beta activation  
320 may reflect input to OFC cortical sites, with HFA reflecting spiking output of the same neuronal  
321 population. If these processes reflected different aspects of activation of a single neuronal  
322 population, we would expect significant overlap between low-frequency and HFA encoding  
323 sites. However, in our dataset the amount of overlap was modest, with only a slight  
324 overrepresentation of concurrent HFA and beta-loss encoding, and none for theta-gain encoding.  
325 These observations suggest that low-frequency and HFA encoding mechanisms do not simply  
326 reflect different activation aspects of the same neuronal population. One possibility is that  
327 localized low-frequency input modulates activity throughout other OFC sites by modulating the  
328 degree of oscillatory coherence (Fig. 4), which could facilitate synchronous spiking in entrained  
329 sites and information propagation to downstream targets [44].

330

331 The question arises on the specific roles of beta and theta frequency bands in reward processing.  
332 One possibility is that they reflect different information processing streams or cognitive  
333 processes. Different oscillations may index the engagement of distinct downstream targets,

334 reflecting the need for different adaptive behavioral strategies after gain/loss events. If this was  
335 the case, one can imagine loss events favoring a strategy change after adverse events (i.e.  
336 ‘switch’), with win events favoring perseverance and continued attention after reward (i.e.  
337 ‘stay’). However, previous evidence suggests this may not be the case: beta-band activation has  
338 been proposed to play a role in maintaining, rather than altering, ongoing behavioral patterns  
339 [41]. Consistent with this, electrical stimulation of the caudate nucleus results in extraneous  
340 modulation of beta-band activity and repetitive OCD-like behavior and negative affective states  
341 in macaques [45]. Alternatively, the engaged theta/beta networks could be related not to  
342 behavioral, but to emotional responses after positive/negative events. Consistent with this idea,  
343 prefrontal human beta rhythms, including the ventromedial prefrontal [46] and anterior cingulate  
344 cortices [47] have been implicated in emotional processing and mood regulation. In addition,  
345 beta coherence in limbic areas (hippocampus and amygdala) has been associated with mood in  
346 human patients [48], and different frequency bands in the amygdala-hippocampal circuit underlie  
347 separation of emotionally relevant information [49]. In the context of our decision-making task,  
348 unexpected losses are expected to have a negative emotional impact [50]. Thus, prefrontal beta  
349 oscillations may be a general mechanism underlying emotional responses to negative outcomes  
350 in prefrontal and limbic regions.

351

## 352 **Conclusion**

353 Here we demonstrate that neural oscillations in the human OFC encode behaviorally relevant  
354 reward information, with anatomically interspersed and functionally distinct networks in OFC  
355 encoding positive (gains) and negative (losses) outcomes indexed by power modulations in the  
356 theta and beta bands, respectively. These network-specific power modulations were accompanied



357 by OFC-wide oscillatory coherence in the theta band and reward and the beta band in loss,  
358 providing a potential mechanism for establishment of rapid and reversible functional  
359 connectivity at behaviorally relevant time points. Thus, reward engages separate OFC rhythms  
360 associated with the establishment of distinct brain networks for adaptive decision-making  
361 behavior.

362

## 363 **Materials and Methods**

364 **Subjects.** Data was collected from 10 (4 female) adult subjects with intractable epilepsy who  
365 were implanted with chronic subdural grid and/or strip electrodes as part of a pre-operative  
366 procedure to localize the epileptogenic focus. We paid careful attention to the patient's  
367 neurological condition and only tested when the patient was fully alert and cooperative. The  
368 surgeons determined electrode placement and treatment based solely on the clinical needs of  
369 each patient. Data were recorded at four hospitals: the University of California, San Francisco  
370 (UCSF) Hospital (n=2), the Stanford School of Medicine (n=2), the University of California,  
371 Irvine Medical Center (UCI) (n=5) and at Albany Medical College (n=1). Due to IRB  
372 limitations, subjects were not paid for their participation in the study but were encouraged to  
373 make as many points as possible. As part of the clinical observation procedure, patients were off  
374 anti-epileptic medication during these experiments. Healthy participants (n=10) with no prior  
375 history of neurological disease were recruited from UC Berkeley's undergraduate population and  
376 played an identical version of the gambling task. All subjects gave written informed consent to  
377 participate in the study in accordance with the University of California, Berkeley Institutional  
378 Review Board.

379

380 **Behavioral task.** We probed risk-reward tradeoffs using a simple gambling task in which  
381 subjects chose between a sure payoff and a gamble for potential higher winnings. Trials started  
382 with a fixation cross ( $t=0$ ), followed by the game presentation screen ( $t=750\text{ms}$ ). At that time,  
383 patients were given up to 2s to choose between a fixed prize (safe bet, \$10) and a higher payoff  
384 gamble (e.g. \$30; Figure 1). Gamble prizes varied between \$10 and \$30, in \$5 increments. If the  
385 patient did not choose within the allotted time limit, a timeout occurred and no reward was  
386 awarded for that round. Timeouts were infrequent (9.98% of all trials) and were excluded from  
387 analysis. Gamble win probability varied round by round; at the time of game presentation,  
388 subjects are shown a number between 0-10. At the time of outcome ( $t=550\text{ms}$  post-choice), a  
389 second number (also 0-10) is revealed, and the subject wins the prize if the second number is  
390 greater than the first one. Only integers were presented, and ties were not allowed; therefore, a  
391 shown '2' had a win probability of 80%. The delay between buttonpress and gamble outcome  
392 presentation (550ms) was fixed, and activity for both epochs is temporally aligned. Therefore,  
393 offer value, risk and chosen value vary parametrically on a round-by-round basis, and patients  
394 had full knowledge of the (fair) task structure from the beginning of the game. Both numbers  
395 were randomly generated using a uniform distribution. The gamble outcome (win/loss) was  
396 revealed regardless of subject choice, allowing us to calculate experiential and counterfactual  
397 prediction errors (see Behavioral analysis, below). A new round started 1s after outcome reveal.  
398 Patients played a total of 200 rounds (plus practice rounds), and a full experimental run typically  
399 lasted 12-15min. Location of safe bet and gamble options (left/right) was randomized across  
400 trials. Patients completed a training session prior to the game in which they played at least 10  
401 rounds under the experimenter's supervision until they felt confident they understood the task, at

402 which point they started the game. This gambling task minimized other cognitive demands  
403 (working memory, learning, etc.) on our participants.

404

405 **ECoG Recording.** ECoG was recorded and stored with behavioral data. Data collection was  
406 carried out using Tucker-Davis Technologies (Albany, Stanford and UCSF) or Nihon-Kohden (at  
407 UCI) systems. Data processing was identical across all sites: channels were amplified x10000,  
408 analog filtered (0.01-1000 Hz) with >2kHz digitization rate, re-referenced to a common average  
409 off-line, high-pass filtered at 1.0 Hz with a symmetrical (phase true) finite impulse response  
410 (FIR) filter (~35 dB/octave roll-off). Channels with low signal-to-noise ratio (SNR) were  
411 identified and deleted (i.e. 60 Hz line interference, electromagnetic equipment noise, amplifier  
412 saturation, poor contact with cortical surface). Out of 210 OFC electrodes, 192 were artifact-free  
413 and included in subsequent analyses. Additionally, all channels were visually inspected by a  
414 neurologist to exclude epochs of aberrant or noisy activity (typically <1% of datapoints). A  
415 photodiode recorded screen updates in the behavioral task, recorded in the electrophysiological  
416 system as an analog input and used to synchronize behavioral and electrophysiological data. Data  
417 analysis was carried out in MATLAB and R using custom scripts.

418

419 **Electrophysiological analysis.** ECoG recordings were downsampled to 1KHz. Channels were  
420 visually examined and those with low quality recordings due to bad electrode-brain contact were  
421 excluded from analysis. In our patient sample, no epileptic electrodes were located in OFC.  
422 Recordings were visually examined by a neurologist (RTK), and any trials containing aberrant  
423 epileptiform activity were excluded from subsequent analysis. Electrodes were then re-  
424 referenced using a within-grid/strip common average reference (CAR). Time-frequency

425 decomposition was carried out using a multitaper approach. Briefly, whole-recording  
426 spectrograms were created for each electrode using log-spaced frequencies between 1 and 30Hz.  
427 Spectrograms were then subset by selecting windows of interest around outcome events, as  
428 indicated by the behavioral timestamps, and baseline-subtraction was carried out for each  
429 frequency of interest. For the trials in figure 1C and D, power was calculated by averaging for  
430 theta (4-8Hz) and beta (12-30Hz) across log-spaced frequency bins (4 and 11 frequency bins,  
431 respectively).

432

433 **Behavioral Analysis.** We classified outcomes as win/loss/safe bets, depending on the patient  
434 choice and gamble outcome. Gains and losses refer to gamble trials; safe bet trials refer to trials  
435 in which the patient decided not to gamble, regardless of subsequent gamble outcome. To  
436 examine the relationship between power modulation and win/loss events, we used a linear  
437 regression approach. For each frequency and time of interest, we regressed the power estimate  
438 against outcome (win/loss). The resulting  $R^2$  was then presented as a time-frequency event-  
439 related computational profile (ERCP; figures 1A-B) representing the association between power  
440 modulation and the regressor of interest.

441

442 **Coherence analyses.** Cross-electrode coherence was calculated using the Fieldtrip toolbox [51].  
443 For each within-patient pairwise electrode combination, time-frequency decomposition was  
444 carried out using a Hanning window for frequencies between 1 and 30Hz. Coherence analysis  
445 was carried out using the `ft_connectivityanalysis` function, separately for loss, win and safe bet  
446 trials for each electrode pair and frequency band. To account for inter-subject variability, we  
447 compared the coherence values between loss (Fig. 4A) and win (Fig. 4B) events and safe bet

448 events by using a mixed-effect model that includes subject and electrode identity as random  
449 effects. We used the mixed model to analyze the relationship between coherence and trial type  
450 (win/loss) for all frequency-time combinations in the time immediately preceding and  
451 subsequent to outcome reveal, and captured the statistical significance results as time-frequency  
452 contours.

453

454 Because of the limitations associated with coherence analyses (i.e. they must be carried out in a  
455 within-patient basis, and involve pairs of electrodes which limits its power in patients with lower  
456 number of electrodes), limiting coherence analyses to pairs of encoding electrodes would have  
457 resulted in a small number of pairs, and limited statistical power. Thus, we instead chose to  
458 examine coherence across all electrode pairs for each patient.

459

460 **Anatomical reconstructions.** For each patient, we collected a pre-operative anatomical MRI  
461 (T1) image and a post-implantation CT scan. The CT scan allows identification of individual  
462 electrodes but offers poor anatomical resolution, making it difficult to determine their anatomical  
463 location. Therefore, the CT scan was realigned to the pre-operative MRI scan. Briefly, both the  
464 MRI and CT images were aligned to a common coordinate system and fused with each other  
465 using a rigid body transformation. Following CT-MR co-registration, we compensated for brain  
466 shift, an inward sinking and shrinking of brain tissue caused by the implantation surgery. A hull  
467 of the patient brain was generated using the Freesurfer analysis suite, and each grid and strip was  
468 realigned independently onto the hull of the patient's brain. This step often avoided localization  
469 errors of several millimeters. Subsequently, each patient's brain and the corresponding electrode  
470 locations were normalized to a template using a volume-based normalization technique, and

471 snapped to the cortical surface [52]. Finally, the electrode coordinates are cross-referenced with  
472 labeled anatomical atlases (JuBrain and AAL atlases) to obtain the gross anatomical location of  
473 the electrodes, verified by visual confirmation of electrode location based on surgical notes. Only  
474 electrodes confirmed to be in OFC (n=192) were included in the analysis. For display purposes,  
475 electrodes are displayed over a traced reconstruction of the ventral surface showing putative  
476 Brodmann areas. For analysis of anatomical location of encoding electrodes (Fig. 3), we defined  
477 beta-loss and theta-gain encoding electrodes as those that showed a significant association as  
478 indicated by a permutation test. Briefly, to leverage the time profile of the signals without  
479 imposing restrictions on activation timing, an aggregate statistic was calculated as the sum of F-  
480 stats for the longest stretch of consecutive windows showing a significant association between  
481 power and win or loss (linear regression  $p < 0.05$ ). The aggregate F-stat was subject to a  
482 permutation test by shuffling the behavioral labels (n=1,000 permutations). We then took the  
483 proportion of permuted fits with a sum-of-F-stat higher than that in the original dataset as the  
484 permutation p-value, which was further corrected using a Bonferroni correction (across n=192  
485 electrodes). Electrodes with a corrected permutation p-value  $< 0.05$  were considered active.

486

## 487 **Acknowledgements**

488 We would like to thank the patient volunteers and the research and surgical staff at the recording  
489 sites for their support and cooperation, and members of the Knight lab for assistance with data  
490 collection. This project was supported by NINDS R37NS21135, DARPA SUBNETS UC (to  
491 RTK), NIMH MH112775 (to MH), NIMH K01MH108815 (to IS) and R21MH109851 (to RTK,  
492 MH and IS).

## 493 **Figures**

494 **Fig. 1.** Experimental approach. (A) Anatomical reconstruction showing placement of ECoG  
495 electrodes (n=192) in OFC across all patients (n=10). Each color corresponds to a patient.  
496 Brodmann areas are indicated as A10/A11/A12/A13/A14. (B) Subjects (n=10) chose between a  
497 sure prize and a risky gamble with varying probabilities for potential higher winnings. Trials  
498 resulted in a win if a second number was higher than the first. Gamble outcome was shown  
499 regardless of choice. (C) Subjects' choices were significantly affected by likelihood of winning  
500 the gamble ( $p < 0.001$ , random effects logit analysis), and were comparable to choices of healthy  
501 controls (grey line; all  $p > 0.2$ ). (D) Power modulation associated with gamble outcome reveal  
502 across OFC sites. Plot indicates z-scored power modulation across frequencies (1-30Hz), relative  
503 to the patient choice to gamble or not ( $t=0$ ). Gamble outcome reveal was at 550ms post-choice.

504  
505 **Fig. 2.** Distinct frequency band encoding of wins and losses. (A) and (B) Average event-related  
506 computational profile across all electrodes (n=192), indicating the strength of association (%  
507 explained variance, %EV) between loss (A)/win (B) outcomes and LFP power across frequency  
508 bands. Loss events are associated with beta power modulation, whereas win events are  
509 associated with delta/theta modulation. (C) Average beta power for loss/no loss trials from an  
510 example electrode encoding losses, separated by gamble outcome: loss (blue) or other outcomes  
511 (red). (D) as (C), but showing theta activity in a win encoding electrode for wins (blue) or other  
512 outcomes (red). (E) Average strength of association (% EV) between theta/beta band activity and  
513 gains (left) and losses (red).

514  
515 **Fig. 3 Overlapping gain and loss processing networks.** (A) and (B): electrode positions

516 projected on the orbital surface of a template brain. Electrodes are color-coded according to their  
517 reward-encoding characteristics: beta-band modulation in loss events (blue), theta-band  
518 modulation in win events (red), both (magenta) or no encoding (white). (C) Anatomical pattern  
519 of win and loss encoding. Scatterplot: X (medio-lateral) and Y (fronto-posterior) coordinates of  
520 all recorded electrodes, defined as distance from the z-projection of the anterior commissure  
521 (AC), on a single hemisphere. Color coding as in (A-B). Ellipses indicate 95% confidence  
522 interval across X and Y coordinates; centroids for loss and wins ellipses, indicated by the black-  
523 outlines, are overlapping.

524

525 **Fig. 4. Oscillatory coherence organizes network of active/inactive cortical sites.** (A) Cartoon  
526 depicting the power/coherence modulation results. Losses are associated with beta (12-30Hz)  
527 power increases in a number of cortical sites (blue dots), which engage in beta coherence with  
528 other encoding/non-encoding sites (blue lines). (B) As (A), but for gain encoding. The results are  
529 quantitatively similar to gain encoding, but the set of encoding cortical sites is different, and  
530 power/coherence modulation is in the theta (4-8Hz) frequency band. (C) Average difference in  
531 coherence between loss and safebet trials across all pairs of electrodes. The white vertical dotted  
532 line at  $t=0$  indicates gamble outcome reveal. Contour lines indicate statistical significance  
533 ( $p<0.05$ ,  $p<0.01$ ,  $p<0.001$ , etc.) as established by a mixed-model analysis. (D) As (C), but for  
534 gain vs safebet trials. (E) Overall differences in coherence for gains (left) and losses (right) in the  
535 theta and beta frequency bands, showing a dissociable theta-gains and beta-losses association.

536



## 537 **References**

- 538 1. Padoa-Schioppa C, Assad JA. Neurons in the orbitofrontal cortex encode economic value.  
539 Nat Neurosci. 2006;441: 223–226.
- 540 2. Kennerley SW, Behrens TEJ, Wallis JD. Double dissociation of value computations in  
541 orbitofrontal and anterior cingulate neurons. Nat Neurosci. 2011;14: 1581–1589.
- 542 3. Camille N, Coricelli G, Sallet J, Pradat-Diehl P, Duhamel J-R, Sirigu A. The involvement  
543 of the orbitofrontal cortex in the experience of regret. Science. 2004;304: 1167–1170.
- 544 4. Rudebeck PH, Behrens TE, Kennerley SW, Baxter MG, Buckley MJ, Walton ME, et al.  
545 Frontal cortex subregions play distinct roles in choices between actions and stimuli. J  
546 Neurosci. 2008;28: 13775–13785. doi:10.1523/JNEUROSCI.3541-08.2008
- 547 5. Gottfried JA, O’Doherty J, Dolan RJ. Encoding predictive reward value in human  
548 amygdala and orbitofrontal cortex. Science (80- ). 2003;301: 1104–1107.  
549 doi:10.1126/science.1087919
- 550 6. Wallis JD. Cross-species studies of orbitofrontal cortex and value-based decision-making.  
551 Nat Neurosci. 2012;15: 13–19. doi:10.1038/nn.2956
- 552 7. O’Doherty J, Kringelbach ML, Rolls ET, Hornak J, Andrews C. Abstract reward and  
553 punishment representations in the human orbitofrontal cortex. Nat Neurosci. 2001;4: 95–  
554 102. doi:10.1038/82959
- 555 8. Wallis JD, Miller EK. Neuronal activity in primate dorsolateral and orbital prefrontal  
556 cortex during performance of a reward preference task. Eur J Neurosci. 2003;18: 2069–  
557 2081.
- 558 9. Draguhn A, Buzsáki G. Neuronal Oscillations in Cortical Networks. Science (80- ).  
559 2004;304: 1926–1930.

- 560 10. Fries P. Rhythms for Cognition: Communication through Coherence. *Neuron*. 2015;88:  
561 220–235. doi:10.1016/j.neuron.2015.09.034
- 562 11. Johnson EL, Dewar CD, Solbakk AK, Endestad T, Meling TR, Knight RT. Bidirectional  
563 Frontoparietal Oscillatory Systems Support Working Memory. *Curr Biol*. 2017;27: 1829-  
564 1835.e4. doi:10.1016/j.cub.2017.05.046
- 565 12. Howard MW, Rizzuto DS, Caplan JB, Madsen JR, Lisman J, Aschenbrenner-Scheibe R,  
566 et al. Gamma Oscillations Correlate with Working Memory Load in Humans. *Cereb*  
567 *Cortex*. 2003;13: 1369–1374. doi:10.1093/cercor/bhg084
- 568 13. Benchenane K, Tiesinga PH, Battaglia FP. Oscillations in the prefrontal cortex: a gateway  
569 to memory and attention. *Curr Opin Neurobiol*. 2011;21: 475–485.
- 570 14. Helfrich RF, Fiebelkorn IC, Szczepanski SM, Lin JJ, Parvizi J, Knight RT, et al. Neural  
571 Mechanisms of Sustained Attention Are Rhythmic. *Neuron*. 2018;99: 854-865.e5.  
572 doi:10.1016/j.neuron.2018.07.032
- 573 15. Schroeder CE, Lakatos P. Low-frequency neuronal oscillations as instruments of sensory  
574 selection. *Trends Neurosci*. 2009; doi:10.1016/j.tins.2008.09.012
- 575 16. Michalareas G, Vezoli J, van Pelt S, Schoffelen JM, Kennedy H, Fries P. Alpha-Beta and  
576 Gamma Rhythms Subserve Feedback and Feedforward Influences among Human Visual  
577 Cortical Areas. *Neuron*. 2016;89: 384–397. doi:10.1016/j.neuron.2015.12.018
- 578 17. Donoghue JP, Sanes JN, Hatsopoulos NG, Gaál G. Neural discharge and local field  
579 potential oscillations in primate motor cortex during voluntary movements. *J*  
580 *Neurophysiol*. 1998;79: 159–173. doi:10.1152/jn.1998.79.1.159
- 581 18. Baker SN, Kilner JM, Pinches EM, Lemon RN. The role of synchrony and oscillations in  
582 the motor output. *Exp Brain Res*. 1999;128: 109–117.

- 583 19. Buschman TJ, Miller EK. Goal-direction and top-down control. *Philos Trans R Soc Lond*  
584 *B Biol Sci.* 2014;
- 585 20. Buschman TJ, Denovellis EL, Diogo C, Bullock D, Miller EK. Synchronous Oscillatory  
586 Neural Ensembles for Rules in the Prefrontal Cortex. *Neuron.* 2012;76: 838–846.
- 587 21. Jensen O, Kaiser J, Lachaux JP. Human gamma-frequency oscillations associated with  
588 attention and memory. *Trends in Neurosciences.* 2007. doi:10.1016/j.tins.2007.05.001
- 589 22. Vass LK, Copara MS, Seyal M, Shahlaie K, Farias ST, Shen PY, et al. Oscillations Go the  
590 Distance: Low-Frequency Human Hippocampal Oscillations Code Spatial Distance in the  
591 Absence of Sensory Cues during Teleportation. *Neuron.* 2016;89: 1180–1186.  
592 doi:10.1016/j.neuron.2016.01.045
- 593 23. Marco-Pallares J, Cucurell D, Cunillera T, García R, Andrés-Pueyo A, Münte TF, et al.  
594 Human oscillatory activity associated to reward processing in a gambling task.  
595 *Neuropsychologia.* 2008;46: 241–248. doi:10.1016/j.neuropsychologia.2007.07.016
- 596 24. HajiHosseini A, Holroyd CB. Reward feedback stimuli elicit high-beta EEG oscillations  
597 in human dorsolateral prefrontal cortex. *Sci Rep.* 2015;5: 1–8.
- 598 25. Saez I, Lin J, Stolk A, Chang E, Parvizi J, Schalk G, et al. Encoding of multiple reward-  
599 related computations in transient and sustained high-frequency activity in human OFC.  
600 *Curr Biol.* 2018;28: 2889–2899.
- 601 26. Saez I, Lin J, Stolk A, Chang E, Parvizi J, Schalk G, et al. Encoding of Multiple Reward-  
602 Related Computations in Transient and Sustained High-Frequency Activity in Human  
603 OFC. *Curr Biol.* 2018;28: 2889-2899.e3. doi:10.1016/j.cub.2018.07.045
- 604 27. Rudebeck PH, Murray EA. Balkanizing the primate orbitofrontal cortex: distinct  
605 subregions for comparing and contrasting values. *Ann N Y Acad Sci.* 2011;1239: 1–13.

- 606 28. Piai V, Anderson KL, Lin JJ, Dewar C, Parvizi J, Dronkers NF, et al. Direct brain  
607 recordings reveal hippocampal rhythm underpinnings of language processing. *Proc Natl*  
608 *Acad Sci U S A*. 2016;113: 11366–11371.
- 609 29. HajiHosseini A, Rodríguez-Fornells A, Marco-Pallares J. The role of beta-gamma  
610 oscillations in unexpected rewards processing. *Neuroimage*. 2012;60: 1678–1685.
- 611 30. Cohen MX, Elger CE, Ranganath C. Reward expectation modulates feedback-related  
612 negativity and EEG spectra. *Neuroimage*. 2007;35: 968–978.
- 613 31. Cunillera T, Fuentemilla L, Periañez J, Marco-Pallarès J, Krämer UM, Càmarà E, et al.  
614 Brain oscillatory activity associated with task switching and feedback processing. *Cogn*  
615 *Affect Behav Neurosci*. 2012;12: 16–33. doi:10.3758/s13415-011-0075-5
- 616 32. Dymond S, Lawrence NS, Dunkley BT, Yuen KSL, Hinton EC, Dixon MR, et al. Almost  
617 winning: Induced MEG theta power in insula and orbitofrontal cortex increases during  
618 gambling near-misses and is associated with BOLD signal and gambling severity.  
619 *Neuroimage*. 2014;91: 210–219.
- 620 33. Kawasaki M, Yamaguchi Y. Frontal theta and beta synchronizations for monetary reward  
621 increase visual working memory capacity. *Soc Cogn Affect Neurosci*. 2013;8: 523–530.  
622 doi:10.1093/scan/nss027
- 623 34. Hikosaka K, Watanabe M. Delay activity of orbital and lateral prefrontal neurons of the  
624 monkey varying with different rewards. *Cereb Cortex*. 2000;10: 263–271.
- 625 35. Hare TA, Camerer CF, Rangel A. Self-control in decision-Making involves modulation of  
626 the vmPFC valuation system. *Science (80- )*. 2009;324: 646–648.  
627 doi:10.1126/science.1168450
- 628 36. Jensen O, Tesche CD. Frontal theta activity in humans increases with memory load in a

- 629 working memory task. *Analysis*. 2002;15: 1–4. doi:10.1046/j.1460-9568.2002.01975.x
- 630 37. Kringelbach ML, Rolls ET. The functional neuroanatomy of the human orbitofrontal  
631 cortex: evidence from neuroimaging and neuropsychology. *Prog Neurobiol*. 2004;72:  
632 341–372.
- 633 38. Rudebeck PH, Murray EA. The orbitofrontal oracle: Cortical mechanisms for the  
634 prediction and evaluation of specific behavioral outcomes. *Urology*. 2014;84: 1143–1156.  
635 doi:10.1016/j.neuron.2014.10.049
- 636 39. Van Wingerden M, Vinck M, Lankelma J, Pennartz CMA. Theta-band phase locking of  
637 orbitofrontal neurons during reward expectancy. *J Neurosci*. 2010;30: 7078–7087.  
638 doi:10.1523/JNEUROSCI.3860-09.2010
- 639 40. Gruber MJ, Watrous AJ, Ekstrom AD, Ranganath C, Otten LJ. Expected reward  
640 modulates encoding-related theta activity before an event. *Neuroimage*. 2013;64: 68–74.
- 641 41. Engel AK, Fries P. Beta-band oscillations - signalling the status quo? *Curr Opin*  
642 *Neurobiol*. 2010;20: 156–165.
- 643 42. Logothetis NK, Pauls J, Augath M, Trinath T, Oeltermann A. Neurophysiological  
644 investigation of the basis of the fMRI signal. *Nat Neurosci*. 2001;412: 150–157.  
645 doi:10.1038/35084005
- 646 43. Leszczynski M, Barczak A, Kajikawa Y, Ulbert I, Falchier AY, Tal I, et al. Dissociation  
647 of Broadband High-Frequency Activity and Neuronal Firing in the Neocortex. *SSRN*  
648 *Electron J*. 2019; doi:10.2139/ssrn.3407384
- 649 44. Buzsáki G, Anastassiou CA, Koch C. The origin of extracellular fields and currents: EEG,  
650 ECoG, LFP and spikes. *Nat Rev Neurosci*. 2012;13: 407–420.
- 651 45. Amemori K ichi, Amemori S, Gibson DJ, Graybiel AM. Striatal Microstimulation Induces

- 652 Persistent and Repetitive Negative Decision-Making Predicted by Striatal Beta-Band  
653 Oscillation. *Neuron*. 2018;99: 829-841.e6. doi:10.1016/j.neuron.2018.07.022
- 654 46. Lipsman N, Kaping D, Westendorff S, Sankar T, Lozano AM, Womelsdorf T. Beta  
655 coherence within human ventromedial prefrontal cortex precedes affective value choices.  
656 *Neuroimage*. 2014;85: 769–778.
- 657 47. Merkl A, Neumann W-J, Huebl J, Aust S, Horn A, Krauss JK, et al. Modulation of Beta-  
658 Band Activity in the Subgenual Anterior Cingulate Cortex during Emotional Empathy in  
659 Treatment-Resistant Depression. *Cereb Cortex*. 2016;26: 2626–2638.
- 660 48. Kirkby LA, Luongo FJ, Lee MB, Nahum M, Van Vleet TM, Rao VR, et al. An  
661 Amygdala-Hippocampus Subnetwork that Encodes Variation in Human Mood. *Cell*.  
662 2018;175: 1688-1700.e14. doi:10.1016/j.cell.2018.10.005
- 663 49. Zheng J, Anderson KL, Leal SL, Shestyuk A, Gulsen G, Mnatsakanyan L, et al.  
664 Amygdala-hippocampal dynamics during salient information processing. *Nat Commun*.  
665 2017;8: 1–11.
- 666 50. Rutledge RB, Skandali N, Dayan P, Dolan RJ. A computational and neural model of  
667 momentary subjective well-being. *Proc Natl Acad Sci U S A*. 2014;111: 12252–12257.
- 668 51. Oostenveld R, Fries P, Maris E, Schoffelen J-M. FieldTrip: Open Source Software for  
669 Advanced Analysis of MEG, EEG, and Invasive Electrophysiological Data. *Comput Intell*  
670 *Neurosci*. 2011;2011: 1–9.
- 671 52. Stolk A, Griffin S, Meij R, Dewar C, Sáez I, Lin JJ, et al. Integrated analysis of  
672 anatomical and electrophysiological human intracranial data. *Nat Protoc*. 2018;13: 1699–  
673 1723. doi:10.1038/s41596-018-0009-6
- 674

**A**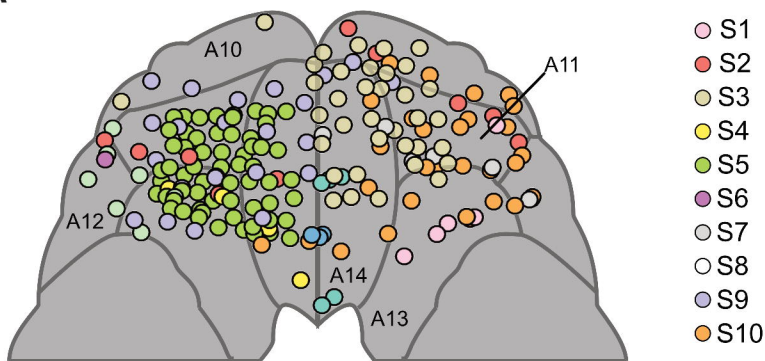**B**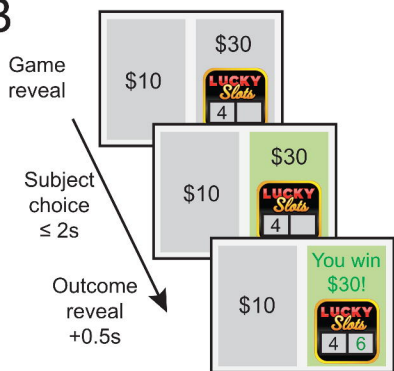**C**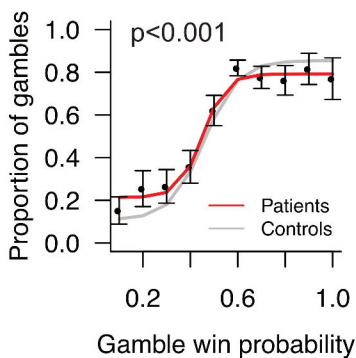**D**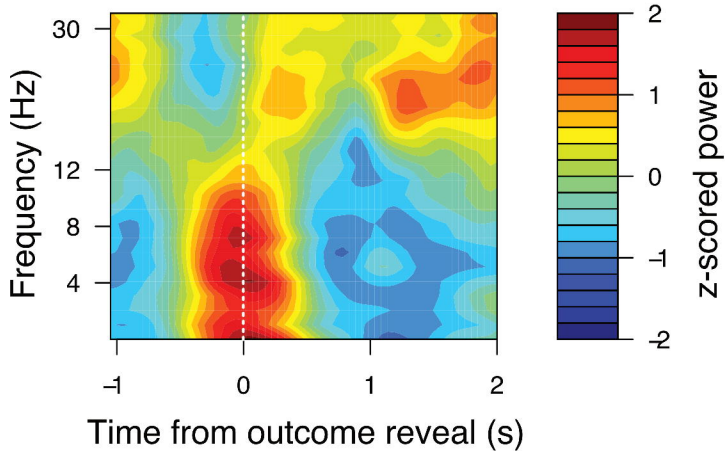

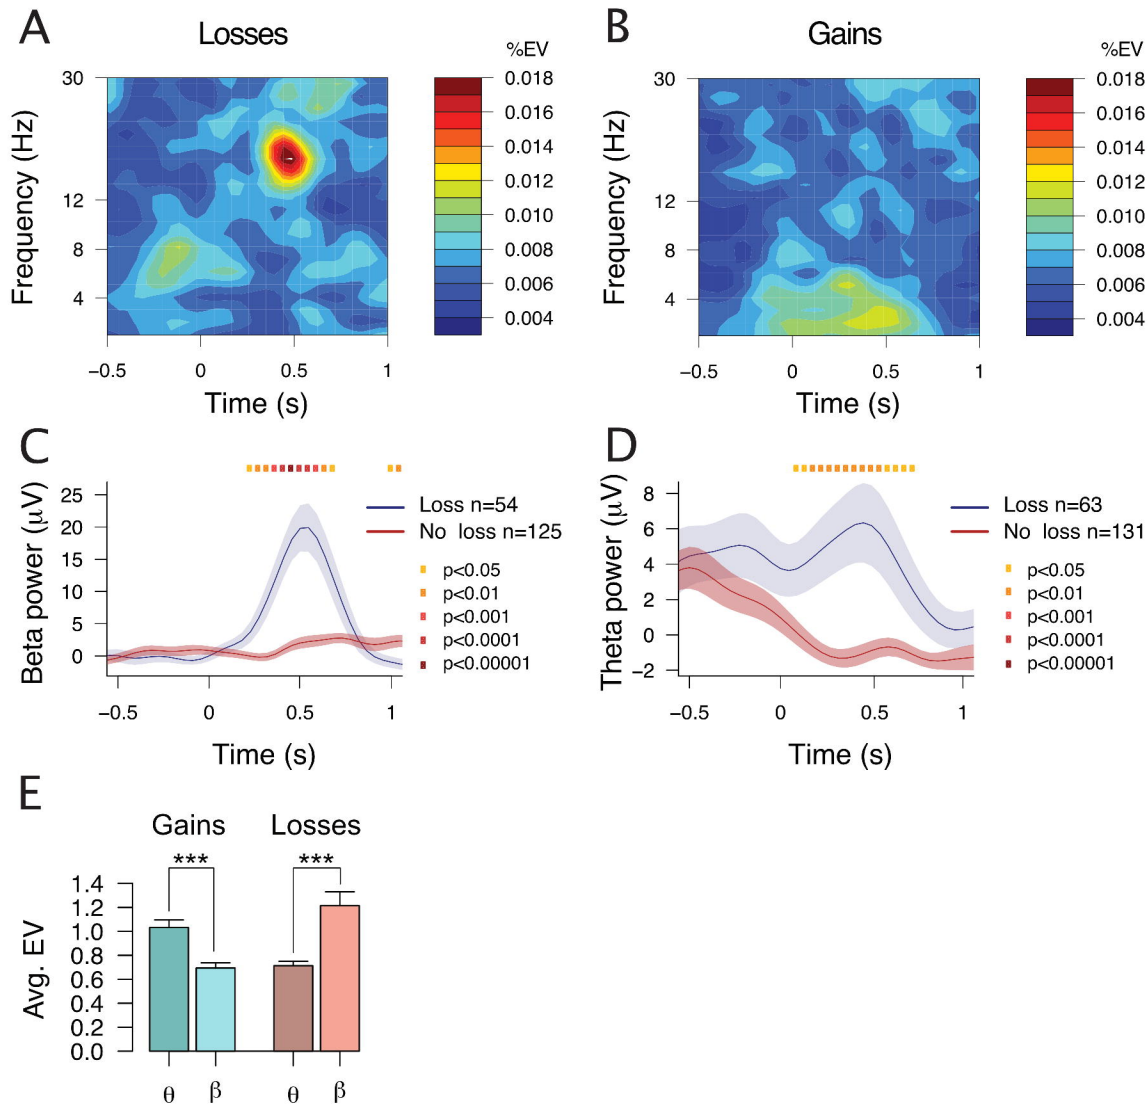



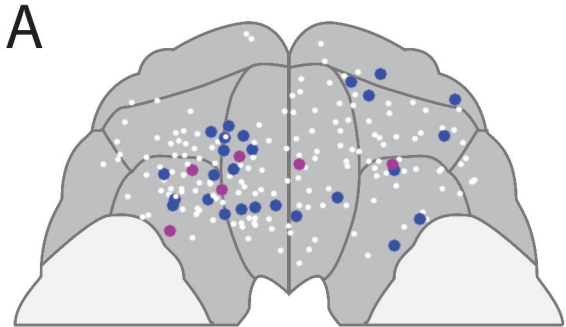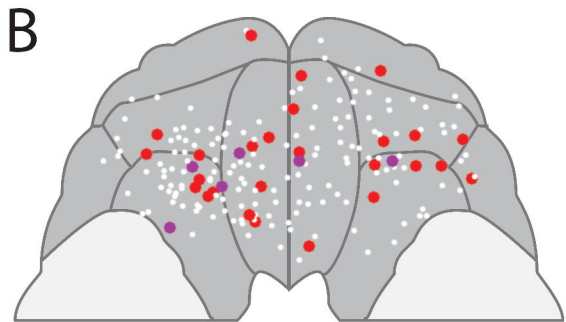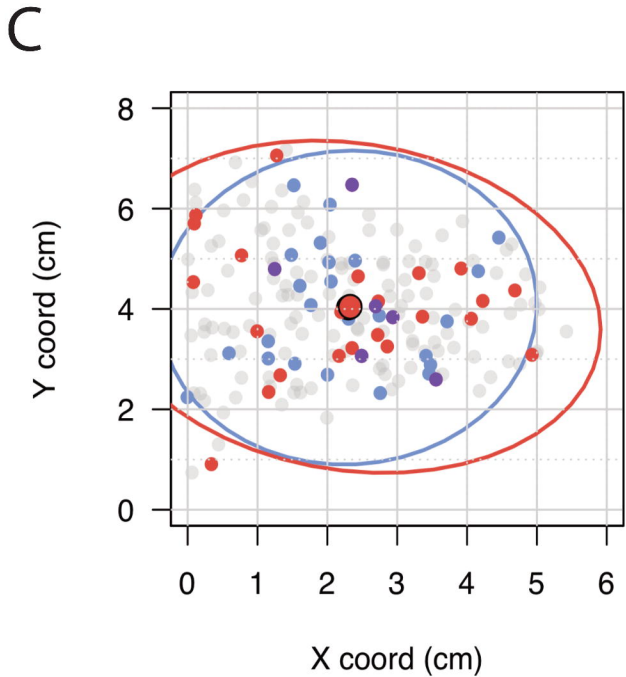

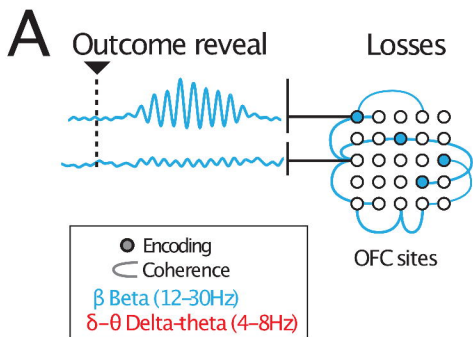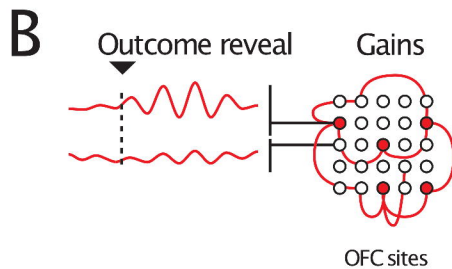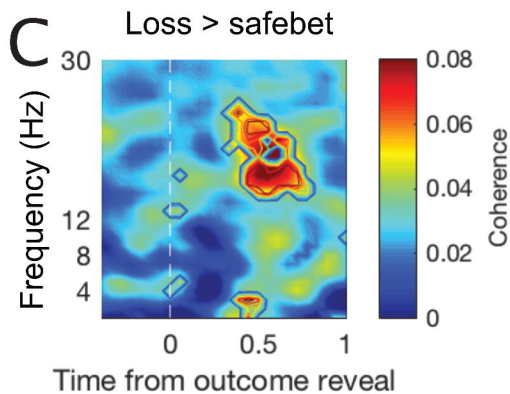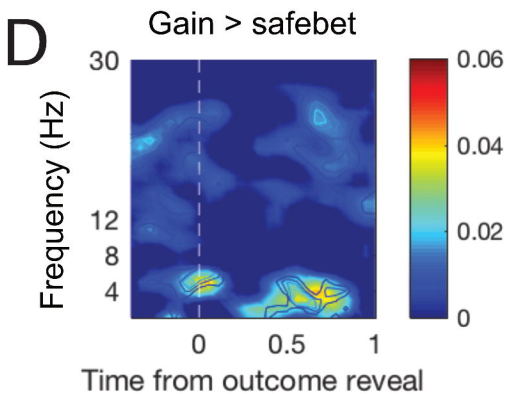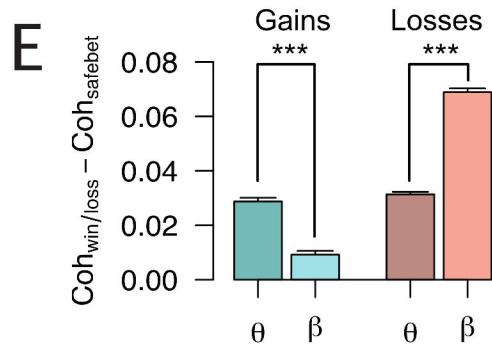

Source: https://biorxiv.org/content/10.1101/2021.02.25.432874v1.full.pdf
